# Supplementary material
Source: PubMed Central journal article supplement (PMC7055207)
Supplement: NIHMS1545046-supplement-Supplemental_Figures_and_Table.pdf [file NIHMS1545046-supplement-Supplemental_Figures_and_Table.pdf]

Figure S1.

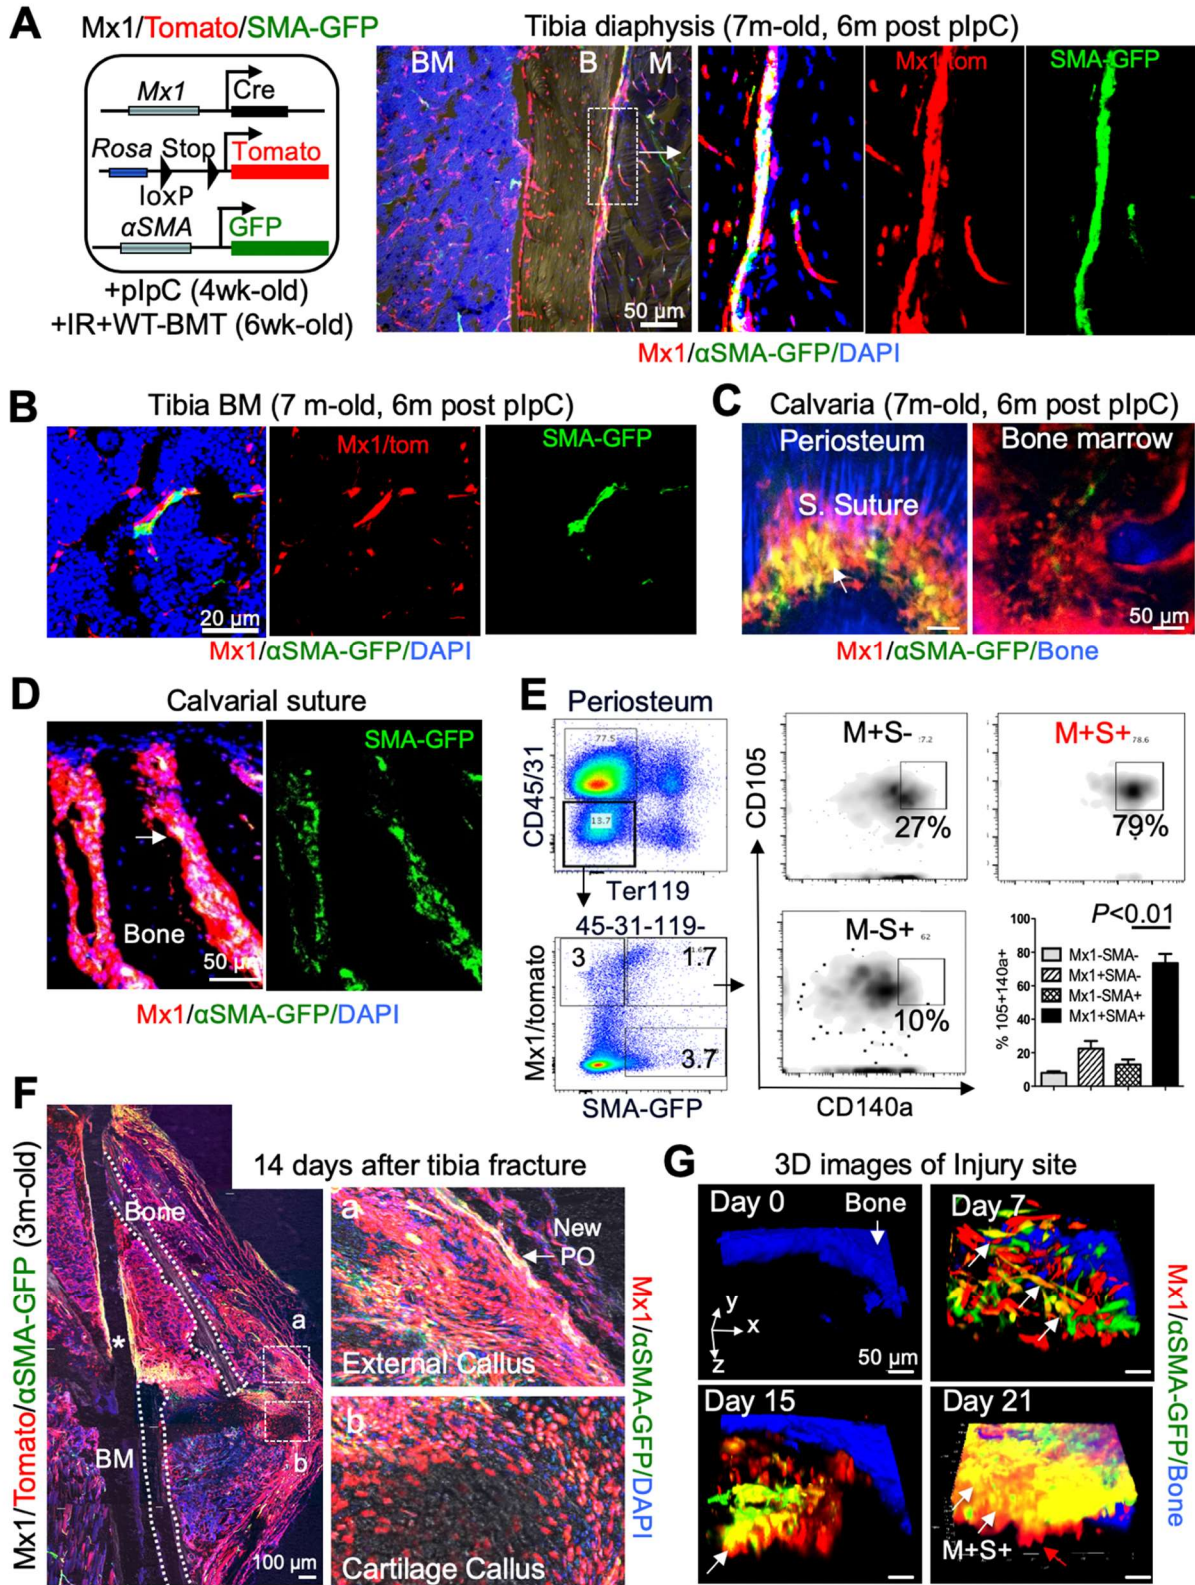

**Figure S1.  $Mx1^+\alpha SMA^+$  cells are localized to the periosteum and highly express SSPC markers, related to Figure 1.** To induce *Mx1* labeling (red), 4-week old *Mx1*/Tomato/ $\alpha SMA$ -GFP dual reporter mice were treated with 5 doses (10 days) of plpC. Two weeks later, mice were lethally irradiated and underwent wild-type bone marrow transplantation (WT-BMT). The analysis was performed at least 1 month after WT-BMT. **A.** The periosteal  $Mx1^+\alpha SMA^+$  population in the tibia of 7-month old *Mx1*/Tomato/ $\alpha SMA$ -GFP dual reporter mice (6 months post plpC) was analyzed by anti-GFP immunofluorescence staining for enhancing GFP signals. White box indicates periosteal  $Mx1^+\alpha SMA^+$  cells (red and green). Right image panels are single channel (Tomato or GFP) images of boxed area. DAPI: Blue; M: muscle; B: bone; BM: bone marrow. Data represent more than five independent experiments. **B.** Bone marrow  $Mx1^+$  cells (Tomato<sup>+</sup>) that are distinct from  $\alpha SMA^+$  cells (GFP<sup>+</sup>) were assessed by anti-GFP immunofluorescence staining of tibial bone marrow of *Mx1*/Tomato/ $\alpha SMA$ -GFP mice from A. **C & D.** The  $Mx1^+\alpha SMA^+$  population in the calvarial suture of *Mx1*/Tomato/ $\alpha SMA$ -GFP dual reporter mice was analyzed by intravital microscopy (**C**) and anti-GFP immunofluorescence staining (**D**). White Arrow (D) indicate  $Mx1^+\alpha SMA^+$  cells (Tomato<sup>+</sup>GFP<sup>+</sup>) in the calvarial suture. **E.** The periosteal  $Mx1^+\alpha SMA^+$  cell population highly expresses SSC-specific markers CD105 and CD140a. Graph shows percentages of the CD105<sup>+</sup>CD140a<sup>+</sup> SSC population within  $Mx1^+\alpha SMA^+$ ,  $\alpha SMA^+$ , or  $Mx1^+$  cells from the periosteum as determined by flow cytometry (n=6). **F.** 14 days after transverse tibial fracture, robust contribution of the  $Mx1^+$  (Tomato<sup>+</sup>) periosteal cells to the external callus (box a), repopulation of  $Mx1^+\alpha SMA^+$  (Tomato<sup>+</sup>GFP<sup>+</sup>) cells in the new periosteum (white arrow, New PO), and their contribution to cartilaginous callus (box b) were assessed by immunostaining with anti-GFP antibody. Intermedullary pin insertion (\*), fractured bone (dot lines) and BM are indicated (n=5). **G.** 3-D reconstruction of *in vivo* z-stack images of the injury site shown in Fig. 1F.  $Mx1^+\alpha SMA^+$  cells (arrows) newly appear at the injury site by day 7. By day 21 the injury is filled with more differentiated  $Mx1^+\alpha SMA^-$  cells (red arrow), while  $Mx1^+\alpha SMA^+$  P-SSCs (white arrow) mainly reside in the outer surface of the injury (representative of 5 independent experiments).

Figure S2.

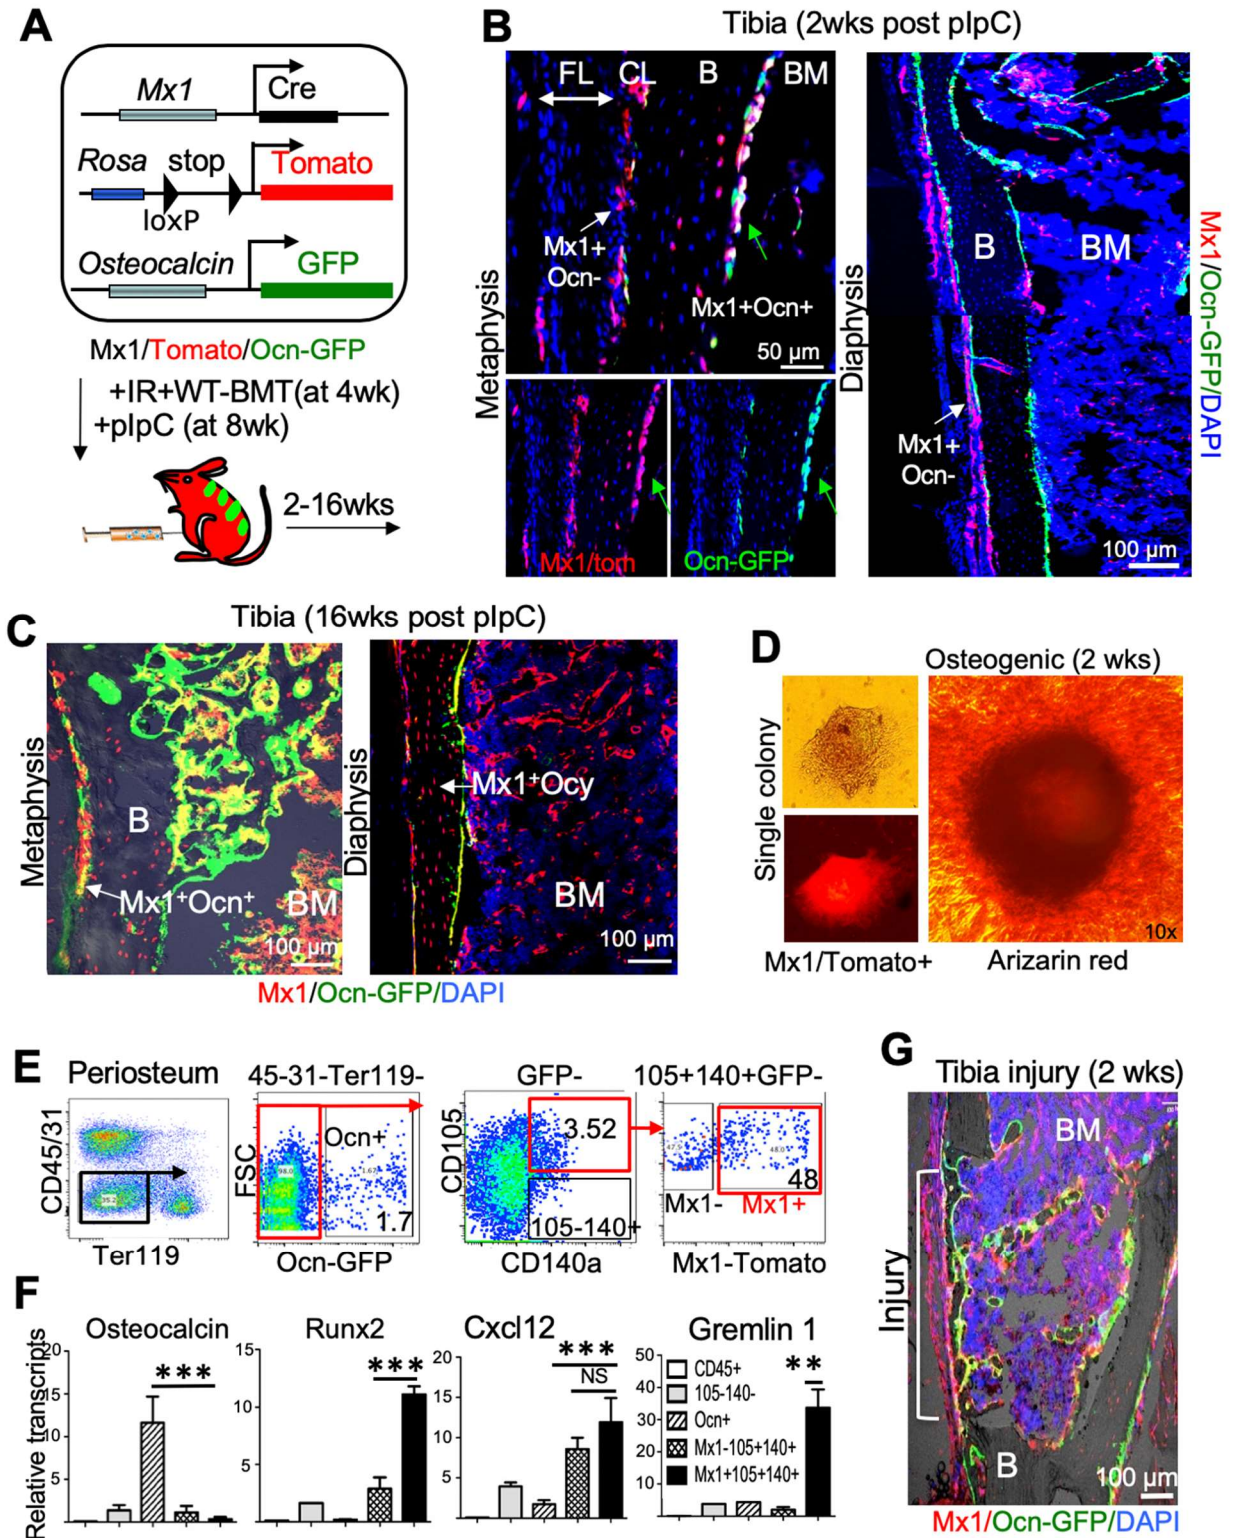

**Figure S2.  $Mx1^+$  periosteal cells are clonogenic progenitors responsible for callus-forming cells *in vivo*, related to Figure 2.** **A.** Schematic representation of  $Mx1$ -Cre<sup>+</sup> *Rosa26*-Tomato<sup>+</sup> *osteocalcin*-GFP<sup>+</sup> mice. Four-week-old  $Mx1$ /Tomato/Ocn-GFP dual reporter mice were lethally irradiated and underwent WT-BMT to reduce the background of hematopoietic lineage cells.  $Mx1$ -Cre was induced at 2 months of age in  $Mx1$ /Tomato/Ocn-GFP mice with 5 doses (10 days) of plpC. **B.** Tibia sections of  $Mx1$ /Tomato/Ocn-GFP mice two weeks after plpC treatment show that most periosteal  $Mx1^+$  cells are undifferentiated ( $Mx1^+$ Ocn<sup>-</sup>) and reside in the inner cambium layer (CL), rather than the fibrous layer (FL). Differentiated osteoblasts ( $Mx1^+$ Ocn<sup>+</sup>, red and green) in the endosteal surface are indicated by green arrows (n=5). **C.** Increase in  $Mx1^+$  progenitor contribution to the periosteal osteoblasts and osteocytes (right bottom) over time. 16 weeks after plpC induction, newly differentiated osteoblasts ( $Mx1^+$ Ocn<sup>+</sup>: red and green) and osteocytes ( $Mx1^+$  Ocy) from  $Mx1^+$  periosteal progenitor cells in the periosteum and endosteum of  $Mx1$ /Tomato/Ocn-GFP mice (~6-month old, 16 weeks post-plpC) were analyzed by anti-GFP immunofluorescent staining (n=3). **D.** After induction of  $Mx1$  with plpC and WT-BMT, single cell cultures of  $Mx1^+$  periosteal cells (red) displayed colony formation. Cells from single colony were further incubated in osteogenic medium for 28 days and stained with Alizarin Red. **E & F.**  $Mx1^+$  progenitors in the periosteum show SSC characteristics. Hematopoietic cells (CD45<sup>+</sup>), bone marrow stromal cells (CD105<sup>-</sup>CD140<sup>+</sup>), osteoblasts (Ocn<sup>+</sup>),  $Mx1^-$  and  $Mx1^+$  SSCs from  $Mx1$ /Tomato/Ocn-GFP mouse bones were sorted, and the levels of the indicated genes were quantified by qRT-PCR. \*\*  $P < 0.01$ ; \*\*\*  $P < 0.001$ . **G.** Robust contribution of  $Mx1^+$  periosteal progenitors (red) to the majority of new periosteal cells and callus-forming osteoblasts (red and green), without detectable responses of  $Mx1^+$  bone marrow cells (tomato) 2 weeks after proximal tibial injury. Bone (B) and bone marrow (BM) are indicated. Blue, DAPI (B, C, G). Data represent at least 3-5 mice per group (A-C).

**Figure S3.**

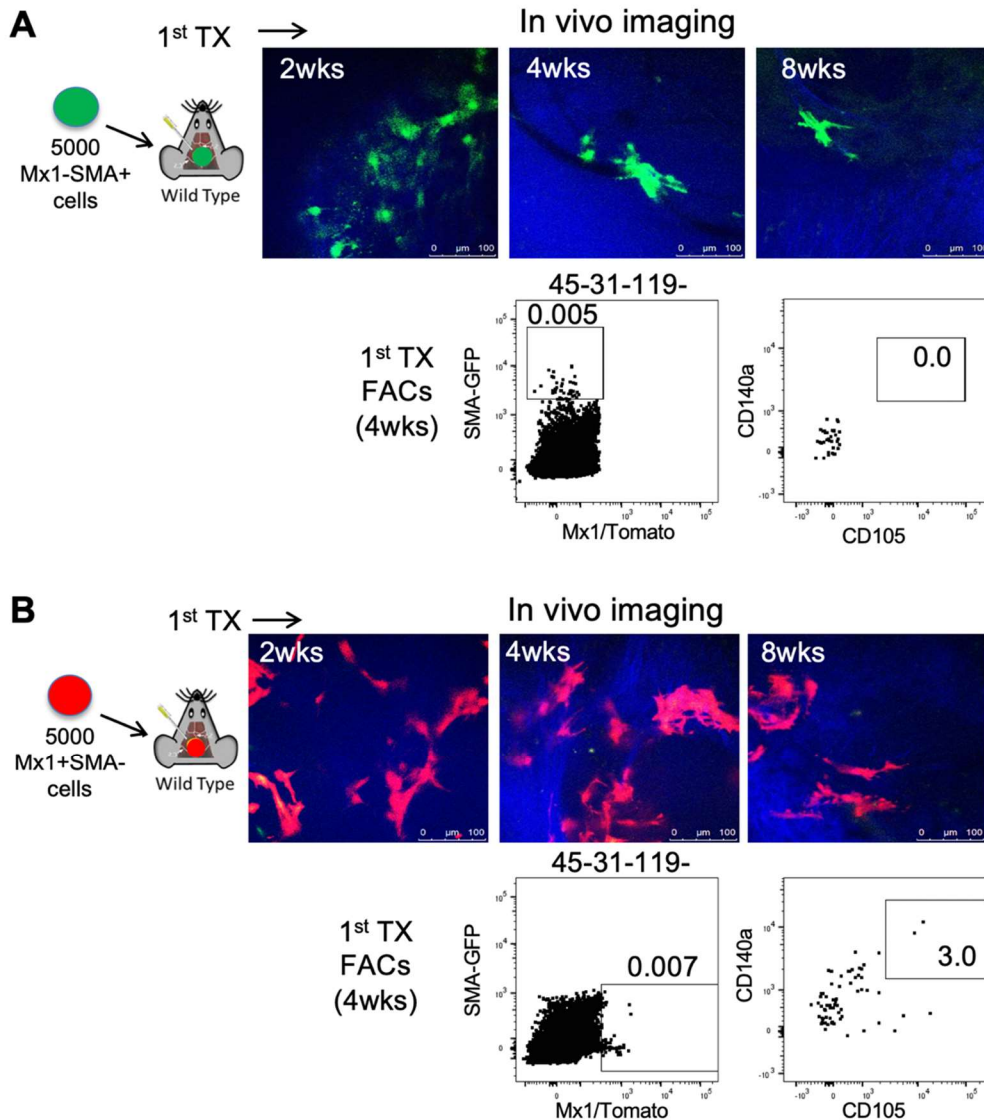

**Figure S3. Periosteal cell transplantation related to Figure 3C.** Mx1/Tomato/ $\alpha$ SMA-GFP dual reporter mice were treated with 5 doses of plpC every other day to induce *Mx1* labeling (red) at 4 weeks of age, followed by lethal irradiation and WT-BMT. Periosteal cells from 10-12-week old Mx1/Tomato/ $\alpha$ SMA-GFP mice were FACS-sorted for CD45<sup>-</sup>CD31<sup>-</sup>Ter119<sup>-</sup>CD105<sup>+</sup>CD140<sup>+</sup>Mx1<sup>+</sup> $\alpha$ SMA<sup>-</sup> (*Mx1*<sup>+</sup> $\alpha$ SMA<sup>-</sup>) and CD45<sup>-</sup>CD31<sup>-</sup>Ter119<sup>-</sup>CD105<sup>+</sup>CD140<sup>+</sup>Mx1<sup>-</sup> $\alpha$ SMA<sup>+</sup> (*Mx1*<sup>-</sup> $\alpha$ SMA<sup>+</sup>) cell populations. Approximately 5,000 *Mx1*<sup>-</sup> $\alpha$ SMA<sup>+</sup> (A) or *Mx1*<sup>+</sup> $\alpha$ SMA<sup>-</sup> (B) cells were transplanted onto calvarial injury sites of wild-type C57BL/6 mice. Transplanted cells were then tracked using intravital microscopy 2, 4, and 8 weeks post transplantation. Four weeks after transplantation, transplanted cells were FACS-analyzed for SSC markers (CD105 and CD140a). Data represent five independent transplants per group with comparable results.

**Figure S4.**

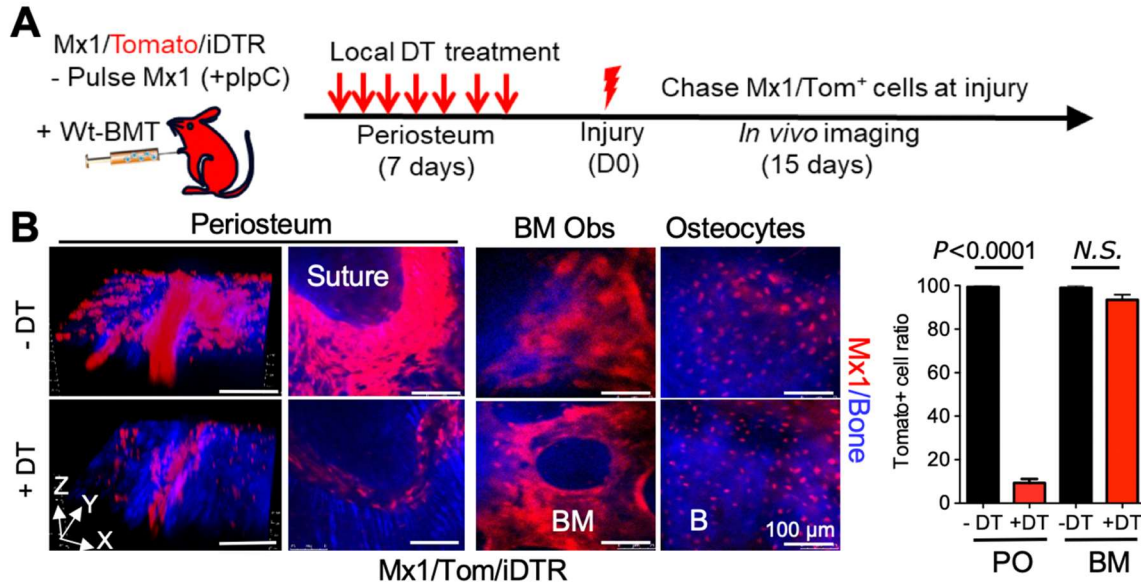

**Figure S4. *Mx1*<sup>+</sup> P-SSCs are necessary for bone healing, related to Figure 3D. A.** The periosteum of 10-12-week old *Mx1*/Tomato/iDTR mice (plpC at 4 weeks of age and WT-BMT at 6 weeks of age) was treated locally with a low-dose of diphtheria toxin (+DT; 20  $\mu$ L at 1  $\mu$ g/mL) or control (-DT; PBS) for seven days to ablate *Mx1*<sup>+</sup> (Tomato<sup>+</sup>) periosteal cells, but not bone marrow cells. **B.** Local ablation of *Mx1*<sup>+</sup> periosteal cells. The DT-mediated reduction of the *Mx1*<sup>+</sup> (Tomato<sup>+</sup>) populations in the periosteum (PO), without change of *Mx1*<sup>+</sup> cells in the bone marrow (BM) or osteocytes within the bone, was analyzed by *in vivo* imaging. Data represent at least three independent experiments with comparable results. Scale bar, 100  $\mu$ m.

Figure S5.

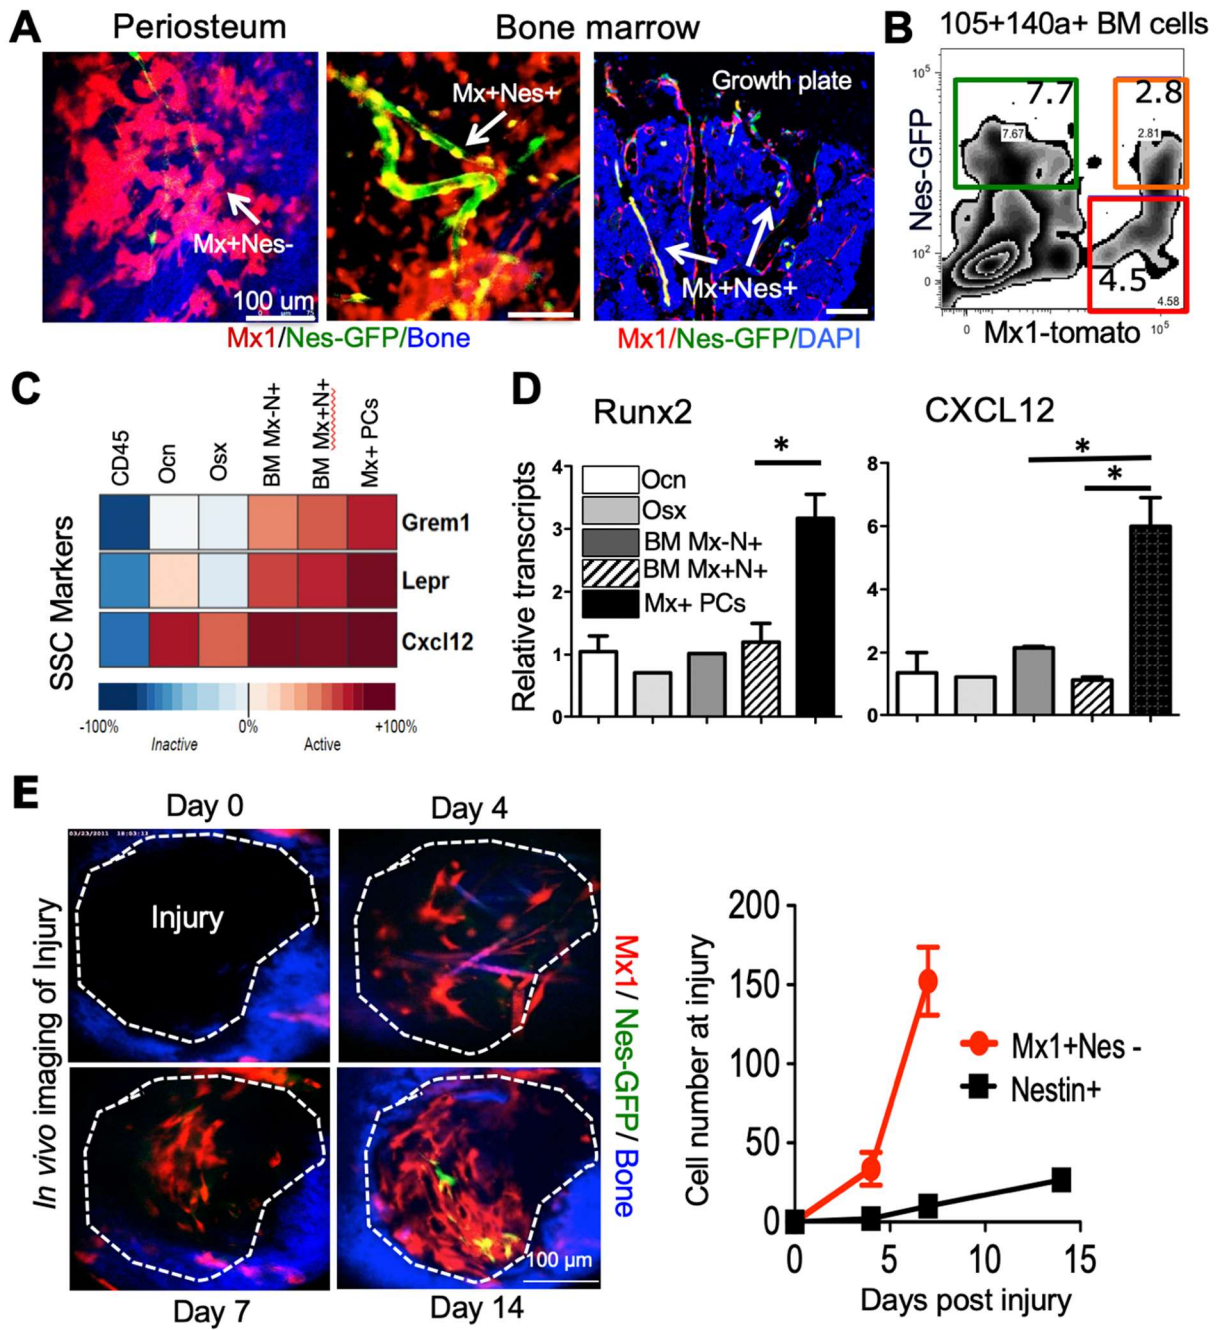

**Figure S5. *Mx1*<sup>+</sup> periosteal cells distinct from *Nestin*<sup>+</sup> BM-SSCs supply new osteoblasts in fracture healing, related to Figure 4B & C.** **A.** Representative *in vivo* image of the periosteum (left) and bone marrow perivascular cells (middle), and an immunofluorescence image of a tibia section (right) from 10-12-weeks old *Mx1*/Tomato/*Nestin*-GFP mice (8 weeks after plpC and WT-BMT) (n>5). **B.** The percentages of *Mx1*<sup>+</sup>*Nestin*<sup>+</sup>, *Nestin*<sup>+</sup>, or *Mx1*<sup>+</sup> skeletal progenitors in CD45<sup>-</sup>CD31<sup>-</sup>Ter119<sup>-</sup>CD105<sup>+</sup>CD140<sup>+</sup> cells from *Mx1*/Tomato/*Nestin*-GFP bones were determined by flow cytometry (n>5). **C & D.** CD45<sup>+</sup> hematopoietic cells (CD45), GFP<sup>+</sup> cells from *Osteocalcin*-GFP mice (*Ocn*), GFP<sup>+</sup> cells from *Osterix*-GFP mice (*Osx*), and *Mx1*<sup>-</sup>*Nestin*<sup>+</sup> (BM *Mx*-N<sup>+</sup>) and *Mx1*<sup>+</sup>*Nestin*<sup>+</sup> (BM *Mx*+N<sup>+</sup>) cells within the CD45<sup>-</sup>CD31<sup>-</sup>Ter119<sup>-</sup>CD105<sup>+</sup>CD140a<sup>+</sup> population from *Mx1*/Tomato/*Nestin*-GFP mouse bone marrow (BM) and *Mx1*<sup>+</sup>*Ocn*<sup>-</sup> periosteal cells (*Mx1*<sup>+</sup> PCs) within the CD45<sup>-</sup>CD31<sup>-</sup>Ter119<sup>-</sup>CD105<sup>+</sup>CD140a<sup>+</sup> population from *Mx1*/Tomato/*Ocn*-GFP mice were sorted. Heatmaps (**C**) represent the relative gene expression levels of SSC markers compared with ~10,000 public microarray datasets (global-scale meta-analysis with Gene Expression Commons). The relative expression level of SSC markers (**D**, *Runx2* and *Cxcl12*) in the indicated cells was analyzed by RT-PCR (n=5 per group). \* *P*<0.05. **E.** *Mx1*<sup>+</sup> SSCs, but not *Nestin*-GFP<sup>+</sup> cells, supply the majority of osteoblasts in fracture healing. *Mx1*<sup>+</sup> (Tomato<sup>+</sup>) and *Nestin*-GFP<sup>+</sup> cells near the injury site on calvaria of *Mx1*/Tomato/*Nestin*-GFP mice were imaged at the indicated times after injury.



**Figure S7**

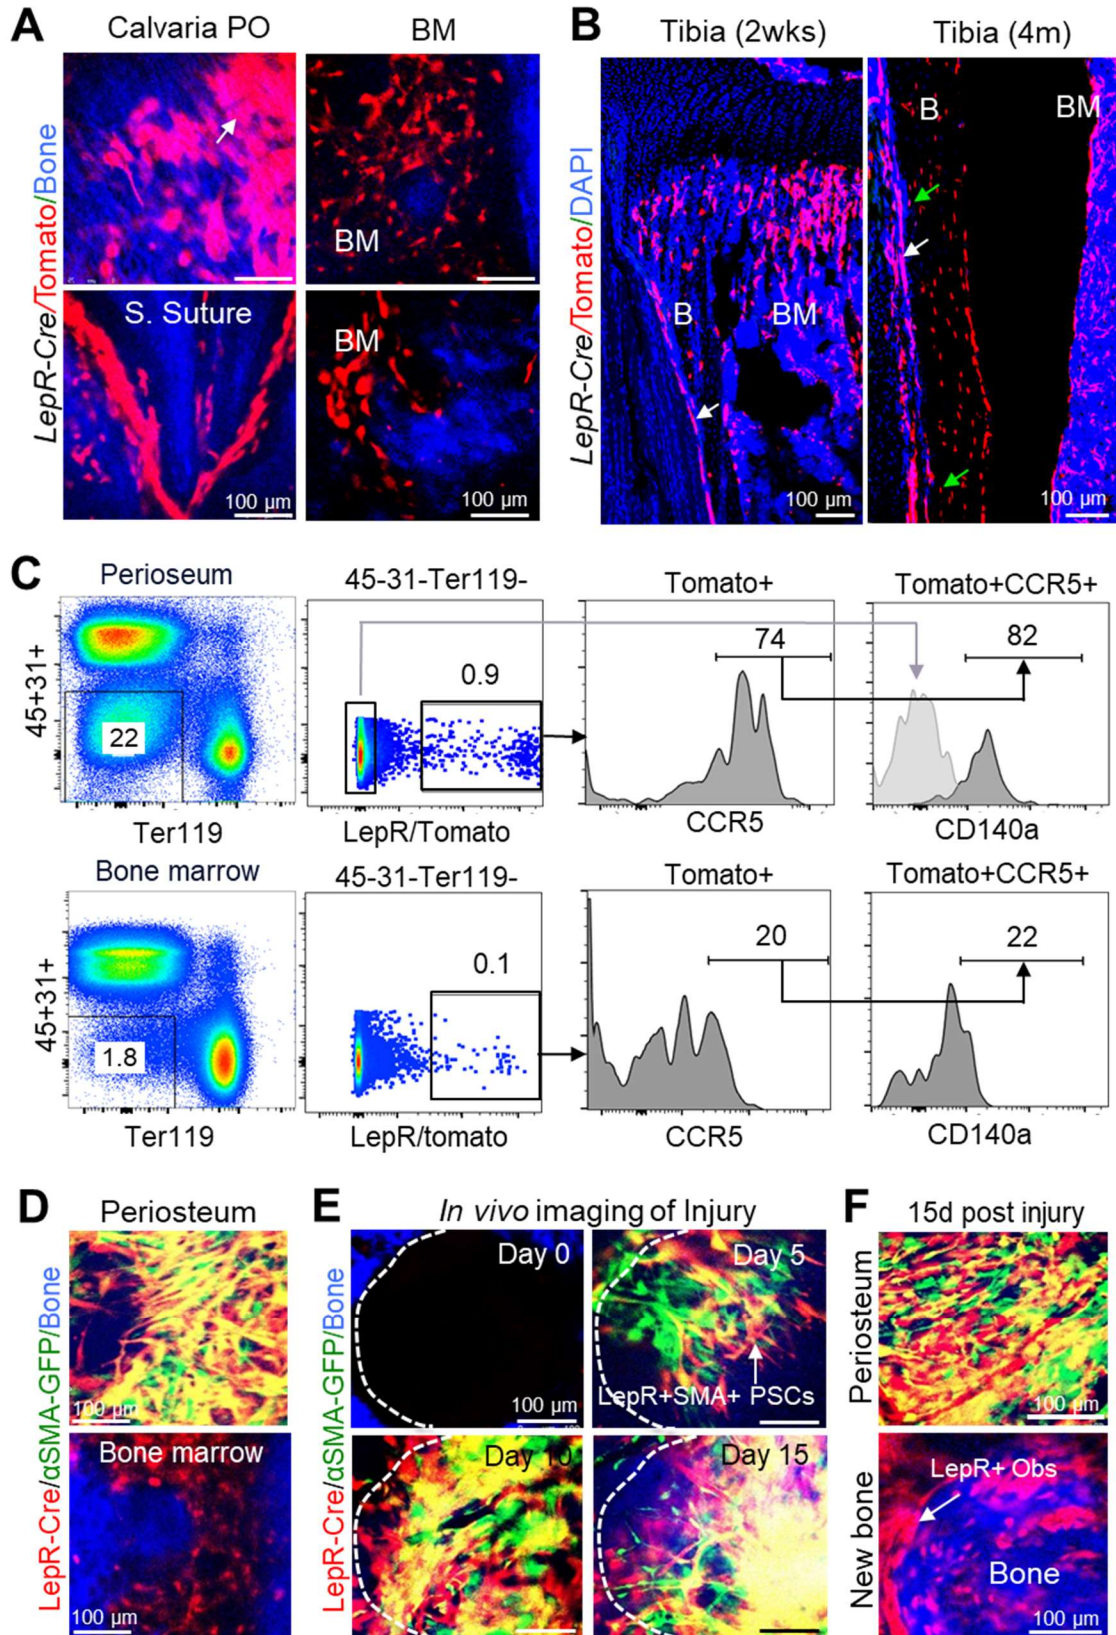

**Figure S6. *LepR*<sup>+</sup> periosteal cells are distinct from *LepR*<sup>+</sup> bone marrow cells and supply new osteoblasts in fracture healing, related to Figure 4. A.** *In vivo* imaging of *LepR*-*Cre*<sup>+</sup>*Rosa26*-*Tomato*<sup>+</sup> reporter mice. *LepR*<sup>+</sup> (*Tomato*<sup>+</sup>) cells are present in the periosteum, sutures, and bone marrow (BM) of the calvaria. **B.** Representative tibia sections from 2-week old and 4-month old *LepR*/*Tomato* mice showing distinct *LepR*<sup>+</sup> progenitor cells (white arrows) present in the periosteum and their increasing contribution to *LepR*<sup>+</sup> osteocytes (4m, green arrows) with age. Bone (B), and bone marrow (BM). Blue, DAPI. **C.** CCR5 and CD140a expression of *LepR*<sup>+</sup> cells isolated from the periosteum (top) or bone marrow (bottom) was analyzed by flow cytometry (n>5). **D.** Selective labeling of *LepR*<sup>+</sup>*αSMA*<sup>+</sup> cells in the periosteum was assessed by *in vivo* imaging of calvarial periosteum and the underneath bone marrow of 10-12-week old *LepR*/*Tomato*/*αSMA*-GFP dual reporter mice. **E.** Sequential *in vivo* imaging of *LepR*<sup>+</sup> (*Tomato*<sup>+</sup>), *αSMA*<sup>+</sup> (GFP<sup>+</sup>), and *LepR*<sup>+</sup>*αSMA*<sup>+</sup> (*Tomato*<sup>+</sup>GFP<sup>+</sup>) cells in response to a calvarial injury on days 0, 4, 7, and 12 post-injury. Arrow (day 5) indicates migrating and/or proliferating *LepR*<sup>+</sup>*αSMA*<sup>+</sup> periosteal cells near the injury site. Blue, bone. **F.** Fifteen days after injury, *LepR*<sup>+</sup>*αSMA*<sup>+</sup> cells are abundant on the regenerating periosteum (top image), contributing to the majority of bone-forming osteoblasts (*LepR*<sup>+</sup> Obs) within the newly formed bone at the injury site (blue; bottom image).

Table S1. Primer sequences for RT-qPCR related to STAR Methods

| <b>Gene</b>   | <b>Primer Bank ID</b> | <b>Sequence</b>         |
|---------------|-----------------------|-------------------------|
| GAPDH-F       | NM-001012477          | CGCCAAGGTCGTGCGCCG      |
| GAPDH-R       | NM-008084             | TGTGTCCGTCGTGGATCTGA    |
| Runx2-F       | NM-001146038          | TTCAACGATCTGAGATTTGTGGG |
| Runx2-R       | NM-001146038          | GGATGAGGAATGCGCCCTA     |
| Osteocalcin-F | NM-031368             | CTGACCTCACAGATCCCAAGC   |
| Osteocalcin-R | NM-031368             | TGGTCTGATAGCTCGTCACAAG  |
| CXCL12-F      | NM-001012477          | CGCCAAGGTCGTGCGCCG      |
| CXCL12-R      | NM-013655             | TTGGCTCTGGCGATGTGGC     |
| LepR-F        | NM-146146             | GTCTTCGGGGATGTGAATGTC   |
| LepR-R        | NM-146146             | ACCTAAGGGTGGATCGGGTTT   |
| Gremlin-F     | NM-146007             | GCTCTCCTTCGTCTTCCTC     |
| Gremlin-R     | NM-146007             | AGTGTATGCGGTGCGATTC     |
